# Supplementary material for: A Macroscopic Exploration of the Ideoscape on Exosomes for Bone Regeneration Using BERTopic and Knowledge Graphs
Source: Preprints.org preprint supplement (doi:10.20944/preprints202407.2583.v1), 2024-08-02
Supplement: Supplementary file 1 [file supplementary]

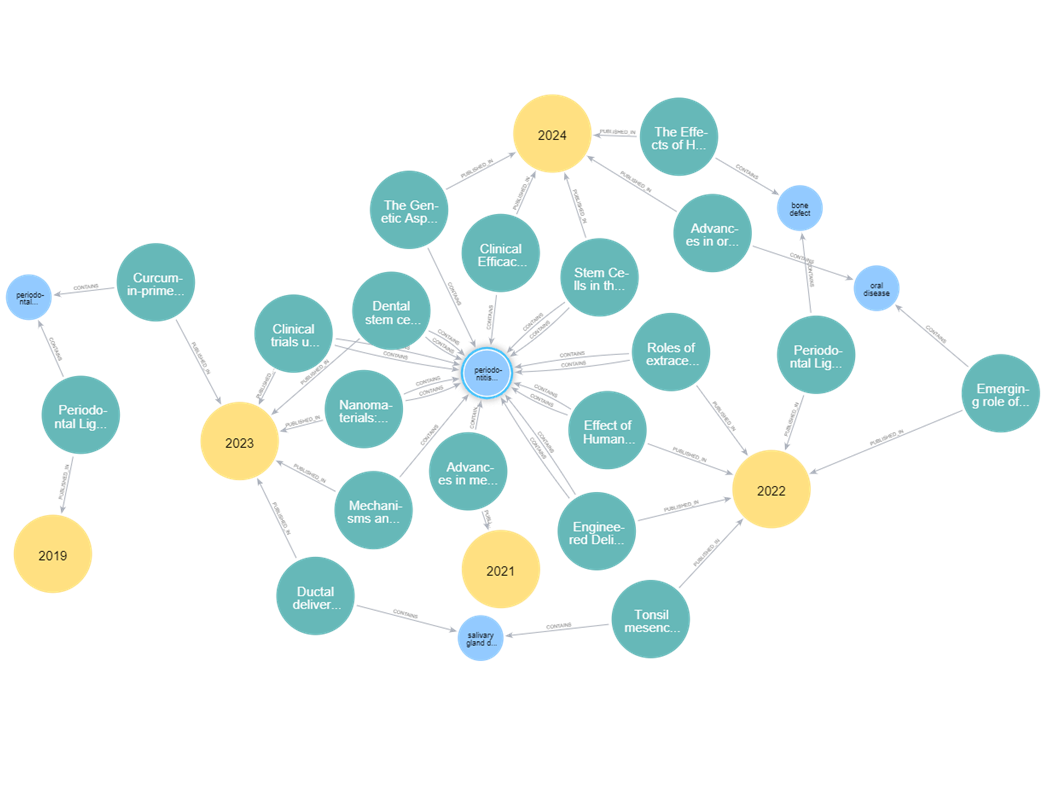


**Supplementary Figure S1.** Neo4j Knowledge graph of Disease category nodes (light blue) connected to at least two article nodes (dark green. A part of their title is written on the node). Yellow nodes indicate publication year.
